# Supplementary material for: Individualized Prediction of PTSD Symptom Severity in Trauma Survivors From Whole-Brain Resting-State Functional Connectivity
Source: PubMed Central journal article supplement (PMC7779396; doi:10.3389/fnbeh.2020.563152), 2020-12-21
Supplement: Data_Sheet_1.pdf [file Data_Sheet_1.pdf]

## *Supplementary Material*

**Table S1.** Subcortical-cerebellum regions of 268-node functional atlas.

| Node             | MNI coordinates |       |       | Lobe        |
|------------------|-----------------|-------|-------|-------------|
|                  | X               | Y     | Z     |             |
| Right cerebellum | 32.2            | -78.5 | -40.4 | Cerebellum  |
| Right cerebellum | 6.1             | -50.7 | -12.3 | Cerebellum  |
| Right cerebellum | 39.1            | -74.9 | -29.7 | Cerebellum  |
| Right cerebellum | 13.7            | -40.1 | -25.4 | Cerebellum  |
| Right cerebellum | 23.5            | -35.9 | -43.0 | Cerebellum  |
| Right cerebellum | 6.9             | -67.9 | -37.8 | Cerebellum  |
| Right cerebellum | 7.1             | -69.0 | -20.9 | Cerebellum  |
| Right cerebellum | 46.0            | -46.5 | -42.4 | Cerebellum  |
| Right cerebellum | 16.2            | -47.2 | -52.3 | Cerebellum  |
| Right cerebellum | 23.4            | -59.3 | -52.1 | Cerebellum  |
| Right cerebellum | 21.1            | -54.8 | -23.8 | Cerebellum  |
| Right cerebellum | 11.7            | -84.1 | -34.5 | Cerebellum  |
| Right cerebellum | 19.6            | -73.5 | -50.0 | Cerebellum  |
| Right cerebellum | 36.7            | -57.1 | -32.8 | Cerebellum  |
| Right cerebellum | 23.0            | -71.8 | -29.1 | Cerebellum  |
| Right cerebellum | 7.6             | -56.7 | -50.8 | Cerebellum  |
| Right cerebellum | 41.9            | -64.0 | -49.2 | Cerebellum  |
| Right cerebellum | 7.1             | -53.7 | -34.4 | Cerebellum  |
| Right cerebellum | 33.8            | -47.2 | -53.9 | Cerebellum  |
| Right cerebellum | 30.4            | -36.4 | -31.1 | Cerebellum  |
| Right caudate    | 21.2            | -36.4 | 22.6  | Subcortical |
| Right caudate    | 12.7            | 12.9  | 11.5  | Subcortical |
| Right caudate    | 13.7            | -4.2  | 20.9  | Subcortical |
| Right caudate    | 12.6            | 20.2  | -0.7  | Subcortical |
| Right putamen    | 26.6            | 6.3   | 0.1   | Subcortical |
| Right putamen    | 14.0            | 8.3   | -9.5  | Subcortical |
| Right thalamus   | 10.5            | -26.8 | -2.2  | Subcortical |
| Right thalamus   | 12.3            | -27.7 | 13.5  | Subcortical |
| Right thalamus   | 5.5             | -9.7  | 5.2   | Subcortical |
| Right brainstem  | 4.7             | -37.2 | -53.0 | Subcortical |
| Right brainstem  | 9.7             | -18.7 | -30.7 | Subcortical |
| Right brainstem  | 6.0             | -22.2 | -42.3 | Subcortical |
| Right brainstem  | 6.3             | -24.9 | -17.5 | Subcortical |
| Right brainstem  | 7.5             | -34.2 | -37.3 | Subcortical |
| Left cerebellum  | -6.5            | -66.2 | -37.7 | Cerebellum  |
| Left cerebellum  | -8.7            | -50.6 | -39.6 | Cerebellum  |
| Left cerebellum  | -37.0           | -52.9 | -31.1 | Cerebellum  |

|                 |       |       |       |             |
|-----------------|-------|-------|-------|-------------|
| Left cerebellum | -8.7  | -55.2 | -52.1 | Cerebellum  |
| Left cerebellum | -21.2 | -70.0 | -48.9 | Cerebellum  |
| Left cerebellum | -40.3 | -74.2 | -29.1 | Cerebellum  |
| Left cerebellum | -30.2 | -80.2 | -40.3 | Cerebellum  |
| Left cerebellum | -19.3 | -46.4 | -53.2 | Cerebellum  |
| Left cerebellum | -6.5  | -50.2 | -11.4 | Cerebellum  |
| Left cerebellum | -27.8 | -36.0 | -30.9 | Cerebellum  |
| Left cerebellum | -42.6 | -63.7 | -46.3 | Cerebellum  |
| Left cerebellum | -10.3 | -81.7 | -32.3 | Cerebellum  |
| Left cerebellum | -8.0  | -68.4 | -19.9 | Cerebellum  |
| Left cerebellum | -34.6 | -50.3 | -54.0 | Cerebellum  |
| Left cerebellum | -22.7 | -57.9 | -48.8 | Cerebellum  |
| Left cerebellum | -10.3 | -37.7 | -25.1 | Cerebellum  |
| Left cerebellum | -46.4 | -46.8 | -42.9 | Cerebellum  |
| Left cerebellum | -26.3 | -69.5 | -30.5 | Cerebellum  |
| Left cerebellum | -21.2 | -53.4 | -23.5 | Cerebellum  |
| Left cerebellum | -6.6  | -54.7 | -26.3 | Cerebellum  |
| Left cerebellum | -24.3 | -37.8 | -44.3 | Cerebellum  |
| Left caudate    | -10.8 | 23.9  | 9.6   | Subcortical |
| Left caudate    | -12.5 | 11.6  | 8.7   | Subcortical |
| Left caudate    | -10.4 | 10.9  | -8.1  | Subcortical |
| Left caudate    | -14.6 | -3.5  | 21.1  | Subcortical |
| Left putamen    | -24.8 | 5.6   | -0.1  | Subcortical |
| Left thalamus   | -9.6  | -25.4 | -1.4  | Subcortical |
| Left thalamus   | -4.9  | -10.3 | 5.8   | Subcortical |
| Left thalamus   | -11.6 | -25.6 | 14.8  | Subcortical |
| Left brainstem  | -5.0  | -21.5 | -15.8 | Subcortical |
| Left brainstem  | -4.5  | -38.0 | -53.1 | Subcortical |
| Left brainstem  | -7.2  | -33.0 | -39.4 | Subcortical |
| Left brainstem  | -6.1  | -18.9 | -36.8 | Subcortical |

---

MNI, Montreal Neurological Institute.

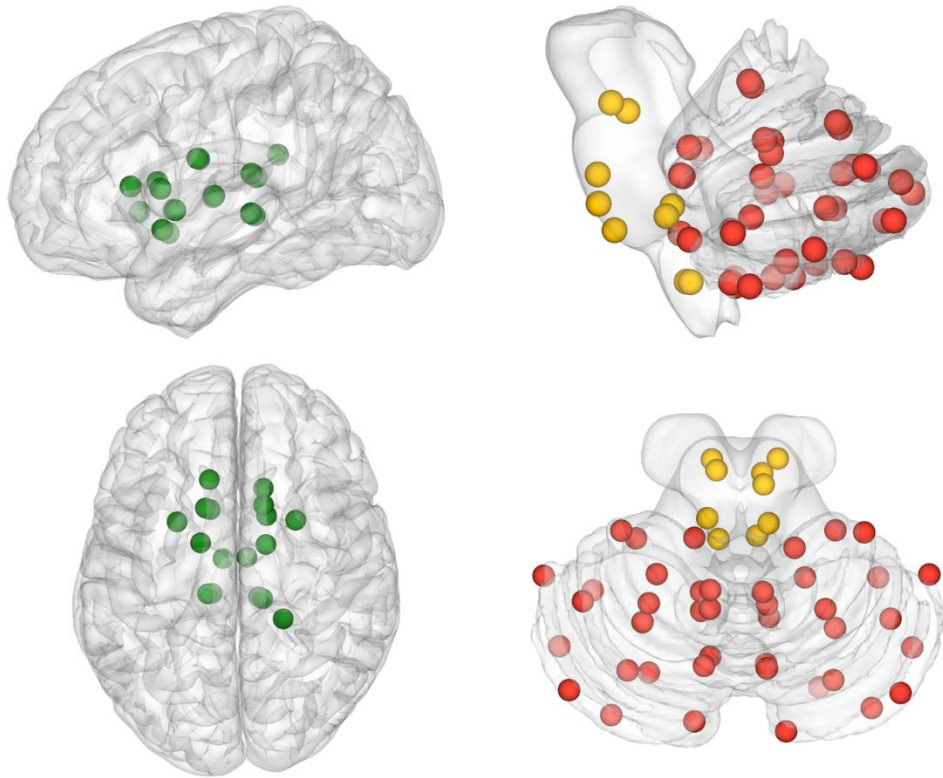

**Figure S1.** Basal ganglia, brainstem and cerebellum regions of 268-node functional atlas. The nodes were mapped onto the cortical surfaces by using the BrainNet Viewer package (<http://www.nitrc.org/projects/bnv>). The basal ganglia regions were presented in green, brainstem in yellow, and cerebellum in red.

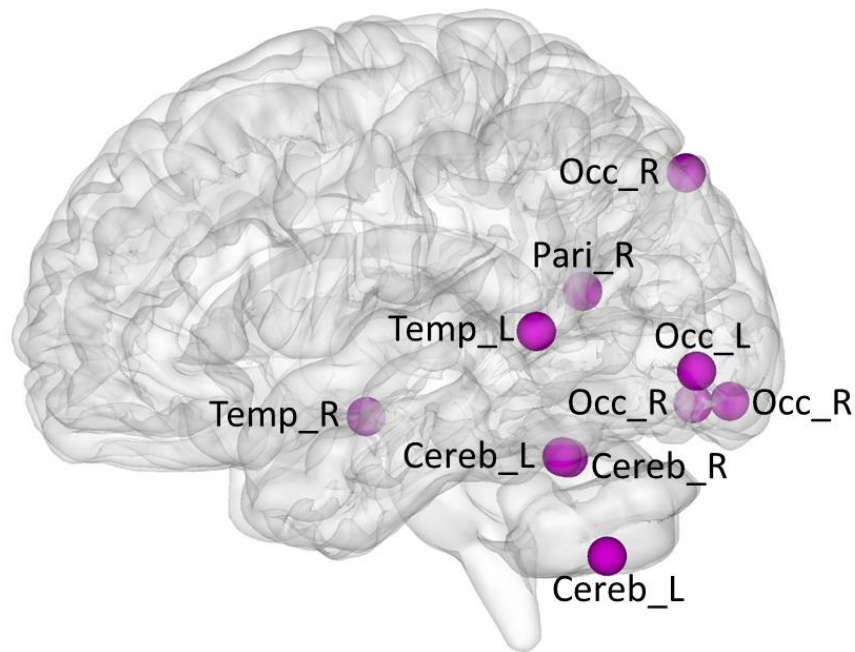

**Figure S2.** Regions providing the greatest contribution to single-subject classification of PTSD patients and trauma-exposed non PTSD controls. The nodes were mapped onto the cortical surfaces by using the BrainNet Viewer package (<http://www.nitrc.org/projects/bnv>). PTSD, posttraumatic stress disorder; L, left; R, right; Occ, occipital; Temp, temporal; Pari, parietal; Cereb, cerebellum.
